# Supplementary material for: Sol-gel synthesis of monolithic silica gels and glasses from phase-separating tetraethoxysilane–water binary system
Source: Royal Society of Chemistry journal article supplement (doi:10.1039/b900887j), 2009-01-01

Electronically Supplementary Information for:

**Sol-gel synthesis of monolithic silica gels and glasses from phase-separating tetraethoxysilane-water binary system**

Koichi Kajihara,<sup>\*a,b</sup> Masahiro Hirano<sup>a,c</sup> and Hideo Hosono<sup>a,c</sup>

<sup>a</sup> Transparent Electro-Active Materials Project, ERATO-SORST, Japan, Science and Technology Agency, in Frontier Research Center, Mailbox S2-13, Tokyo Institute of Technology, 4259 Nagatsuta, Midori-ku, Yokohama 226-8503, Japan

<sup>b</sup> Department of Applied Chemistry, Graduate School of Urban Environmental Sciences, Tokyo Metropolitan University, 1-1 Minami-Osawa, Hachioji 192-0397, Japan

<sup>c</sup> Frontier Research Center, Tokyo Institute of Technology, 4259 Nagatsuta, Midori-ku, Yokohama 226-8503, Japan

\*E-mail: kkaji@tmu.ac.jp

**Figure S1-Supporting information**

Raman spectra of solutions 1 of  $x=1.8, 1.9, 2.0$  and  $2.2$  taken after stirring for 1 hour since the first mixing, just before the second mixing. Raman spectrum of tetraethoxysilane (TEOS) is also shown. Raman bands at  $657\text{cm}^{-1}$  is due to Si-O-C bonds in TEOS. This band continuously shifts to higher energy side with an increase in the number of OH groups attached to the silicon atom.<sup>1</sup> From comparison to the results of tetramethoxysilane-based systems,<sup>1</sup> Raman band at  $680\text{cm}^{-1}$  is attributed to Si-O-C bonds in  $(\text{EtO})_3\text{SiOH}$ . The intensities of  $680\text{cm}^{-1}$  band and shoulder-like broadening at higher energy side due to Si-O-C bonds in  $(\text{EtO})_{4-n}\text{Si}(\text{OH})_n$  ( $n=2, 3$ ) decrease with an increase in  $x$ , most significantly between  $x=1.9$  and  $2.0$ , indicating a considerable decomposition of ethoxy groups at this  $x$  range.

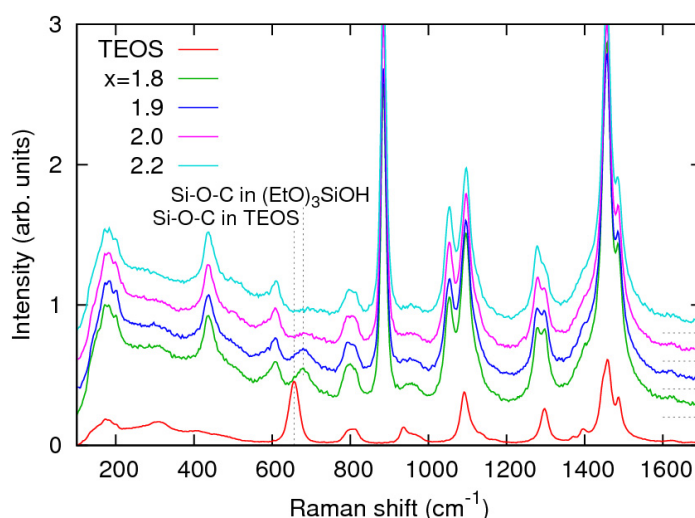

Supplement: b900887j.pdf [file b900887j.pdf]
